# Supplementary material
Source: publisher figshare collection journal article supplement (https://diabetesjournals.figshare.com/articles/dataset/_/17049224)
Supplement: Supplementary file 1 [file 1]

## Supplementary Material 1— Summary of changes in 2022 National Standards

The following summarizes the restructuring of the 2022 National Standards:

- Standards 1 and 2 were consolidated in recognition that one of the most important indicators of sustainability for DSMES is organizational support. Evidence was not found to support the inclusion of a mission statement and goals for the DSMES service outside of the sponsoring organization. While stakeholders outside of the organization may be utilized for guidance, advocacy and support, a formal group adds additional administrative burden for the team.
- Standard 3 evaluates the target population and the resources, personnel, and method of delivery to serve these populations.
- Standards 4 and 5 were consolidated as they both define the DSMES team, and much of the language in the two standards was repetitious. The change also acknowledges the importance of all DSMES team members taking a role in all aspects of DSMES delivery and planning.
- Standards 6 and 8 were consolidated to recognize that ongoing support outside of DSMES is part of the content and delivery of the curriculum.
- Standards 7 and 9 were consolidated to address confusion between individual outcomes that may be tracked at the individual level as opposed to those that can be aggregated (see Standard 10). Both standards relate person centered DSMES services at an individual level. Components that are critical and necessary for continuity of care across DSMES teams and other members of the PWD care team were streamlined, simplified, and clarified in this version.
- Standard 10 was kept the same regarding the quality improvement process for the DSMES service and aggregating the individual and other outcomes on the service level.
- In addition to increasing clarity and reducing burden, the task force was focused on addressing issues of health equity and increased access in every aspect of DSMES.

| 2017                                                                                                                                                                                                       | 2022                                                                                                                 |
|------------------------------------------------------------------------------------------------------------------------------------------------------------------------------------------------------------|----------------------------------------------------------------------------------------------------------------------|
| Standard 1 – Internal Structure<br>Standard 2 – Stakeholder Input<br>Standard 3 – Evaluation of Population Served<br>Standard 4 – Quality Coordinator Overseeing DSMES Services<br>Standard 5 – DSMES Team | Standard 1 – Support for DSMES Services<br>Standard 2 – Population and Service Assessment<br>Standard 3 – DSMES Team |
| Standard 6 – Curriculum<br>Standard 7 – Individualization<br>Standard 8 – Ongoing Support                                                                                                                  | Standard 4 – Delivery and Design of DSMES Services<br>Standard 5 – Person-centered DSMES                             |
| Standard 9 – Participant Progress<br>Standard 10 – Quality Improvement                                                                                                                                     | Standard 6 – Measuring and Demonstrating Outcomes of DSMES Services                                                  |
