# Supplementary material
Source: publisher figshare collection journal article supplement (https://diabetesjournals.figshare.com/articles/dataset/_/17049224)
Supplement: Supplementary file 2 [file 1]

## Supplementary Material 3—Example Assessment Tools

### General Self-Care

- Summary of Diabetes Self-Care Activities (SDSCA)
  - An 11-item or expanded 25-item measure of diabetes self-care behaviors.<sup>149</sup>
- Self-Care Inventory-Revised (SCI-R)
  - A survey that measures what people with diabetes do, versus what they are advised to do in their diabetes treatment plan.<sup>150</sup>

### Psychosocial

- The Diabetes Distress Scale (short form)
  - A two-question initial screening tool to assess diabetes-specific distress (followed by the full 17-item scale when indicated).<sup>151</sup>
- Problem Areas In Diabetes (PAID)
  - A 20-item measure of diabetes-specific distress identifying emotional distress and burden associated with diabetes.<sup>152</sup> Additional versions, such as pediatric, teen, and parent versions<sup>153-155</sup> or shorter 5-item (PAID-5) and 1-item (PAID-1) versions,<sup>156</sup> are available.
- Generalized Anxiety Disorder Scale (GAD-7)
  - A 7-item measure to screen persons for generalized anxiety disorder.<sup>157</sup>
- Patient Health Questionnaire
  - A two-item (PHQ-2)<sup>158</sup> or nine-item (PHQ-9)<sup>159</sup> measure to assess depressive symptoms over the past two weeks.
- Diabetes Strengths and Resilience Measure (DSTAR)
  - A 12-item, self-report measure of adaptive attitudes and behaviors related to living with type 1 diabetes.<sup>160</sup>
- Diabetes Self-Efficacy
  - An eight-item self-report scale designed to assess confidence in performing diabetes self-care activities.<sup>161</sup>

### Social Needs

- The Social Needs Screening tool
  - A 15-item measure for five core health-related social needs (housing, food, transportation, utilities, and personal safety). The tool is available within the EveryONE Project Toolkit from the American Academy of Family Physicians.<sup>162</sup>

### Quality of Life

- The WHO-5 Brief Quality of Life survey
  - Validated in many languages, is a reliable measure of emotional functioning and screen for depression and has been used extensively in research and clinical care,<sup>163</sup> including the DAWN2 study (Diabetes Attitudes Wishes and Needs 2).<sup>164</sup>

### Eating Habits

- Starting The Conversation (STC)
  - An eight-item simplified food frequency instrument designed for use in primary care and health-promotion settings.<sup>165</sup>

### Medication Taking

- Adherence Starts with Knowledge (ASK-12)
  - A 12-item measure of medication taking behaviors and barriers to medication

taking.<sup>166</sup>

## Health Literacy

- Three-Item Screen
  - A tool to measure health literacy. It asks how often someone needs help reading hospital materials, how confident they are filling out forms, and how often they have difficulty understanding their medical condition.<sup>167</sup>

## References

149. Toobert DJ, Hampson SE, Glasgow RE. The summary of diabetes self-care activities measure: results from 7 studies and a revised scale. *Diabetes Care* 2000;23:943–950 DOI: 10.2337/diacare.23.7.943 [PubMed](#)
150. Weinger K, Butler HA, Welch GW, La Greca AM. Measuring diabetes self-care: a psychometric analysis of the Self-Care Inventory-Revised with adults. *Diabetes Care* 2005;28:1346–1352 DOI: 10.2337/diacare.28.6.1346 [PubMed](#)
151. Polonsky WH, Fisher L, Earles J, et al. Assessing psychosocial distress in diabetes: development of the diabetes distress scale. *Diabetes Care* 2005;28:626–631 DOI: 10.2337/diacare.28.3.626 [PubMed](#)
152. Polonsky WH, Anderson BJ, Lohrer PA, et al. Assessment of diabetes-related distress. *Diabetes Care* 1995;18:754–760 DOI: 10.2337/diacare.18.6.754 [PubMed](#)
153. Markowitz JT, Volkening LK, Butler DA, Laffel LM. Youth-perceived burden of type 1 diabetes: problem areas in diabetes survey-pediatric version (PAID-Peds). *J Diabetes Sci Technol* 2015;9:1080–1085 DOI: 10.1177/1932296815583506 [PubMed](#)
154. Weissberg-Benchell J, Antisdel-Lomaglio J. Diabetes-specific emotional distress among adolescents: feasibility, reliability, and validity of the problem areas in diabetes-teen version. *Pediatr Diabetes* 2011;12:341–344 DOI: 10.1111/j.1399-5448.2010.00720.x [PubMed](#)
155. Evans MA, Weil LEG, Shapiro JB, et al. Psychometric properties of the parent and child problem areas in diabetes measures. *J Pediatr Psychol* 2019;44:703–713
156. McGuire BE, Morrison TG, Hermanns N, et al. Short-form measures of diabetes-related emotional distress: the Problem Areas in Diabetes Scale (PAID)-5 and PAID-1. *Diabetologia* 2010;53:66–69 DOI: 10.1007/s00125-009-1559-5 [PubMed](#)
157. Spitzer RL, Kroenke K, Williams JBW, Löwe B. A brief measure for assessing generalized anxiety disorder: the GAD-7. *Arch Intern Med* 2006;166:1092–1097 DOI: 10.1001/archinte.166.10.1092 [PubMed](#)
158. Kroenke K, Spitzer RL, Williams JB. The Patient Health Questionnaire-2: validity of a two-item depression screener. *Med Care* 2003;41:1284–1292 DOI: 10.1097/01.Mlr.0000093487.78664.3c [PubMed](#)

159. Kroenke K, Spitzer RL, Williams JB. The PHQ-9: validity of a brief depression severity measure. *J Gen Intern Med* 2001;16:606–613 DOI: 10.1046/j.1525-1497.2001.016009606.x [PubMed](#)
160. Hilliard ME, Iturralde E, Weissberg-Benchell J, Hood KK. The Diabetes Strengths and Resilience Measure for Adolescents With Type 1 Diabetes (DSTAR-Teen): validation of a new, brief self-report measure. *J Pediatr Psychol* 2017;42:995–1005 DOI: 10.1093/jpepsy/jsx086 [PubMed](#)
161. Ritter PL, Lorig K, Laurent DD. Characteristics of the Spanish- and English-language self-efficacy to manage diabetes scales. *Diabetes Educ* 2016;42:167–177 DOI: 10.1177/0145721716628648 [PubMed](#)
162. American Academy of Family Physicians. The EveryONE project: assessment and action. Accessed 29 September 2021. Available from <https://www.aafp.org/family-physician/patient-care/the-everyone-project/toolkit/assessment.html>
163. Massey CN, Feig EH, Duque-Serrano L, Wexler D, Moskowitz JT, Huffman JC. Well-being interventions for individuals with diabetes: a systematic review. *Diabetes Res Clin Pract* 2019;147:118–133 DOI: 10.1016/j.diabres.2018.11.014 [PubMed](#)
164. Peyrot M, Burns KK, Davies M, et al. Diabetes Attitudes Wishes and Needs 2 (DAWN2): a multinational, multi-stakeholder study of psychosocial issues in diabetes and person-centred diabetes care. *Diabetes Res Clin Pract* 2013;99:174–184 DOI: 10.1016/j.diabres.2012.11.016 [PubMed](#)
165. Paxton AE, Strycker LA, Toobert DJ, Ammerman AS, Glasgow RE. Starting the conversation performance of a brief dietary assessment and intervention tool for health professionals. *Am J Prev Med* 2011;40:67–71 DOI: 10.1016/j.amepre.2010.10.009 [PubMed](#)
166. Matza LS, Park J, Coyne KS, Skinner EP, Malley KG, Wolever RQ. Derivation and validation of the ASK-12 adherence barrier survey. *Ann Pharmacother* 2009;43:1621–1630 DOI: 10.1345/aph.1M174 [PubMed](#)
167. Chew LD, Bradley KA, Boyko EJ. Brief questions to identify patients with inadequate health literacy. *Fam Med* 2004;36:588–594 [PubMed](#)
